# Supplementary material
Source: PubMed Central journal article supplement (PMC5682105)
Supplement: NIHMS890803-supplement-1.pdf [file NIHMS890803-supplement-1.pdf]

Table S1. Hematology and chemistry values in MDA-MB231 bearing NOD-SCID mice treated with vehicle, MV-m-uPA or MV-h-uPA.

|                   | TEST                   | Treatment  |            |            | Normal range | Units of Measure      |
|-------------------|------------------------|------------|------------|------------|--------------|-----------------------|
|                   |                        | Ctrl       | MV-m-uPA   | MV-h-uPA   |              |                       |
| <b>HEMATOLOGY</b> | White Blood Cell Count | 4.18±1.58  | 4.82 ±3.89 | 5.4 ±1.85  | 4.5-9.1      | × 10 <sup>3</sup> /ul |
|                   | Hemoglobin             | 12.15±1.45 | 11.98±1.13 | 11.66±1.42 | 12.8-16.1    | g/dL                  |
|                   | Segmented neutrophils  | 40.83±8.54 | 44.4±13.12 | 38.2±9.47  | 21-57        | %                     |
|                   | Lymphocytes            | 31±10.84   | 27.4±14.22 | 42.6±12.42 | 49-82        | %                     |
|                   | Monocytes              | 21.5±9.05  | 23±2.74    | 12.6±6.42  | 2-8          | %                     |
|                   | Eosinophils            | 5.17±1.6   | 4.2±2.59   | 5.2±1.48   | 0-3          | %                     |
|                   | Basophils              | 1.5±1.3    | 1±0.7      | 1.4±0.54   | 0-3          | %                     |
| <b>CHEMISTRY</b>  | Glucose                | 47.5±19.09 | 52±11.31   | 93.5±4.95  | 90-193       | mg/dL                 |
|                   | BUN                    | 18±1.41    | 11.5.±0.71 | 16.±1.41   | 18-29        | mg/dL                 |
|                   | CREA                   | 0.25±0.07  | 0.2±0      | 0.25±0.21  | 0.1-0.4      | mg/dL                 |
|                   | Calcium                | 7.4±0      | 6.9±1.56   | 8.7±0.28   | 8.7-10.1     | mg/dL                 |
|                   | Phosphorus             | 4.9±0      | 5.85±0.64  | 8.55±1.2   | 5.4-9.3      | mg/dL                 |
|                   | Total Protein          | 4.35±0.07  | 4.15±0.49  | 6.65±0.35  | 4.6-6.9      | g/dL                  |
|                   | ALT                    | 64.5±16.26 | 58.5±9.19  | 127±87.68  | 29-191       | U/L                   |
