# Supplementary material
Source: PubMed Central journal article supplement (PMC5682105)
Supplement: NIHMS890803-supplement-2.pdf [file NIHMS890803-supplement-2.pdf]

**Table S-2. Differential expression for mouse associated genes at day 2**

| Gene Information |         |                  |         | Bio-functions                |              |          |                    |            |            |                   |                 |                |     |                      |          |
|------------------|---------|------------------|---------|------------------------------|--------------|----------|--------------------|------------|------------|-------------------|-----------------|----------------|-----|----------------------|----------|
| Probe ID         | Symbol  | Log2 Fold Change | p Value | Inflammation-immune response | Angiogenesis | Survival | Cell Proliferation | Cell Cycle | Cell death | Tumor progression | Viral Infection | Cell migration | EMT | Cell Differentiation | Invasion |
| NM_183171.4      | Fez1    | 3.326            | 0.006   |                              |              |          |                    |            |            |                   |                 |                |     |                      |          |
| NM_023258.4      | Pycard  | 3.184            | 0.007   |                              |              |          |                    |            |            |                   |                 |                |     |                      |          |
| NM_001043317.2   | Cd22    | 2.989            | 0.004   |                              |              |          |                    |            |            |                   |                 |                |     |                      |          |
| NM_007642.4      | Cd28    | 2.806            | 0.030   |                              |              |          |                    |            |            |                   |                 |                |     |                      |          |
| NM_018857.1      | Msln    | 2.710            | 0.024   |                              |              |          |                    |            |            |                   |                 |                |     |                      |          |
| NM_009696.3      | Apoe    | 0.957            | 0.006   |                              |              |          |                    |            |            |                   |                 |                |     |                      |          |
| NM_013612.2      | Slc11a1 | 0.658            | 0.016   |                              |              |          |                    |            |            |                   |                 |                |     |                      |          |
| NM_001037177.1   | Nfatc2  | 0.594            | 0.013   |                              |              |          |                    |            |            |                   |                 |                |     |                      |          |
| NM_133211.3      | Tlr7    | 0.585            | 0.0003  |                              |              |          |                    |            |            |                   |                 |                |     |                      |          |
| NM_008580.4      | Map3k5  | 0.538            | 0.023   |                              |              |          |                    |            |            |                   |                 |                |     |                      |          |
| NM_010493.2      | Icam1   | 0.527            | 0.010   |                              |              |          |                    |            |            |                   |                 |                |     |                      |          |
| NM_010407.3      | Hck     | 0.451            | 0.015   |                              |              |          |                    |            |            |                   |                 |                |     |                      |          |
| NM_008927.3      | Map2k1  | -0.296           | 0.047   |                              |              |          |                    |            |            |                   |                 |                |     |                      |          |
| NM_008054.2      | Fyn     | -0.333           | 0.045   |                              |              |          |                    |            |            |                   |                 |                |     |                      |          |
| NM_009910.2      | Cxcr3   | -0.351           | 0.036   |                              |              |          |                    |            |            |                   |                 |                |     |                      |          |
| NM_027514.2      | Pvr     | -0.368           | 0.005   |                              |              |          |                    |            |            |                   |                 |                |     |                      |          |
| NM_133655.2      | Cd81    | -0.387           | 0.020   |                              |              |          |                    |            |            |                   |                 |                |     |                      |          |
| NM_008714.2      | Notch1  | -0.392           | 0.017   |                              |              |          |                    |            |            |                   |                 |                |     |                      |          |
| NM_008873.2      | Plau    | -0.400           | 0.019   |                              |              |          |                    |            |            |                   |                 |                |     |                      |          |
| NM_009689.2      | Birc5   | -0.604           | 0.003   |                              |              |          |                    |            |            |                   |                 |                |     |                      |          |
| XM_976068.1      | Dock9   | -0.618           | 0.015   |                              |              |          |                    |            |            |                   |                 |                |     |                      |          |
| NM_008816.2      | Pecam1  | -0.634           | 0.049   |                              |              |          |                    |            |            |                   |                 |                |     |                      |          |
| NM_011587.2      | Tie1    | -0.634           | 0.005   |                              |              |          |                    |            |            |                   |                 |                |     |                      |          |
| NM_009868.3      | Cdh5    | -0.757           | 0.038   |                              |              |          |                    |            |            |                   |                 |                |     |                      |          |
| NM_010382.2      | H2-Eb1  | -0.887           | 0.043   |                              |              |          |                    |            |            |                   |                 |                |     |                      |          |
| NM_010118.2      | Egr2    | -0.917           | 0.040   |                              |              |          |                    |            |            |                   |                 |                |     |                      |          |
| NM_019454.2      | Dll4    | -1.006           | 0.037   |                              |              |          |                    |            |            |                   |                 |                |     |                      |          |
| NM_013563.3      | Il2rg   | -1.064           | 0.009   |                              |              |          |                    |            |            |                   |                 |                |     |                      |          |
| NM_172728.2      | Creb5   | -1.140           | 0.049   |                              |              |          |                    |            |            |                   |                 |                |     |                      |          |
| NM_007426.3      | Angpt2  | -1.169           | 0.029   |                              |              |          |                    |            |            |                   |                 |                |     |                      |          |
| NM_010234.2      | Fos     | -1.676           | 0.005   |                              |              |          |                    |            |            |                   |                 |                |     |                      |          |
| NM_031168.1      | Il6     | -3.826           | 0.002   |                              |              |          |                    |            |            |                   |                 |                |     |                      |          |
| NM_007719.2      | Ccr7    | -4.198           | 0.026   |                              |              |          |                    |            |            |                   |                 |                |     |                      |          |

EMT: Epithelial Mesenchymal transition
