# Supplementary material
Source: PubMed Central journal article supplement (PMC5682105)
Supplement: NIHMS890803-supplement-3.pdf [file NIHMS890803-supplement-3.pdf]

**Table S-3. Differential expression for mouse associated genes at day 5**

| Gene Information |        |                  |         | Bio-functions                    |              |          |                    |            |            |                   |                 |                |             |                      |          |
|------------------|--------|------------------|---------|----------------------------------|--------------|----------|--------------------|------------|------------|-------------------|-----------------|----------------|-------------|----------------------|----------|
| Probe ID         | Symbol | Log2 Fold Change | p Value | Inflammation and immune response | Angiogenesis | Survival | Cell Proliferation | Cell Cycle | Cell death | Tumor progression | Viral Infection | Cell migration | Epithelial- | Cell Differentiation | Invasion |
| NM_009140.2      | Cxcl2  | 6.861            | 0.001   |                                  |              |          |                    |            |            |                   |                 |                |             |                      |          |
| NM_203320.2      | Cxcl3  | 5.696            | 0.005   |                                  |              |          |                    |            |            |                   |                 |                |             |                      |          |
| NM_018866.2      | Cxcl13 | 2.656            | 0.043   |                                  |              |          |                    |            |            |                   |                 |                |             |                      |          |
| NM_009892.2      | Chil3  | 2.431            | 0.017   |                                  |              |          |                    |            |            |                   |                 |                |             |                      |          |
| NM_013650.2      | S100a8 | 1.768            | 0.038   |                                  |              |          |                    |            |            |                   |                 |                |             |                      |          |
| NM_001161790.1   | Mefv   | 1.711            | 0.038   |                                  |              |          |                    |            |            |                   |                 |                |             |                      |          |
| NM_009909.3      | Cxcr2  | 0.981            | 0.038   |                                  |              |          |                    |            |            |                   |                 |                |             |                      |          |
| NM_018825.3      | Sh2b2  | 0.726            | 0.029   |                                  |              |          |                    |            |            |                   |                 |                |             |                      |          |
| NM_008625.1      | Mrc1   | 0.680            | 0.025   |                                  |              |          |                    |            |            |                   |                 |                |             |                      |          |
| NM_010370.2      | Gzma   | 0.667            | 0.008   |                                  |              |          |                    |            |            |                   |                 |                |             |                      |          |
| NM_183426.1      | Sbno2  | 0.390            | 0.023   |                                  |              |          |                    |            |            |                   |                 |                |             |                      |          |
| NM_001037810.1   | Spn    | 0.378            | 0.035   |                                  |              |          |                    |            |            |                   |                 |                |             |                      |          |
| NM_001001892.2   | H2-K1  | -0.443           | 0.046   |                                  |              |          |                    |            |            |                   |                 |                |             |                      |          |
| NM_019963.1      | Stat2  | -0.527           | 0.049   |                                  |              |          |                    |            |            |                   |                 |                |             |                      |          |
| NM_153564.2      | Gbp5   | -0.532           | 0.046   |                                  |              |          |                    |            |            |                   |                 |                |             |                      |          |
| NM_010654.2      | Klrd1  | -0.656           | 0.037   |                                  |              |          |                    |            |            |                   |                 |                |             |                      |          |
| NM_001042605.1   | Cd74   | -0.780           | 0.033   |                                  |              |          |                    |            |            |                   |                 |                |             |                      |          |
| NM_010382.2      | H2-Eb1 | -0.843           | 0.004   |                                  |              |          |                    |            |            |                   |                 |                |             |                      |          |
| NM_008479.1      | Lag3   | -0.865           | 0.023   |                                  |              |          |                    |            |            |                   |                 |                |             |                      |          |
| NM_207105.2      | H2-Ab1 | -0.870           | 0.004   |                                  |              |          |                    |            |            |                   |                 |                |             |                      |          |
| NM_009855.2      | Cd80   | -0.909           | 0.015   |                                  |              |          |                    |            |            |                   |                 |                |             |                      |          |
| NM_010378.2      | H2-Aa  | -0.947           | 0.026   |                                  |              |          |                    |            |            |                   |                 |                |             |                      |          |
| NM_001083322.1   | Klrk1  | -1.587           | 0.009   |                                  |              |          |                    |            |            |                   |                 |                |             |                      |          |
| NM_008176.1      | Xcl1   | -1.894           | 0.019   |                                  |              |          |                    |            |            |                   |                 |                |             |                      |          |
| NM_008798.1      | Pdcd1  | -2.563           | 0.031   |                                  |              |          |                    |            |            |                   |                 |                |             |                      |          |
| NM_009137.2      | Ccl22  | -2.789           | 0.044   |                                  |              |          |                    |            |            |                   |                 |                |             |                      |          |
| NM_133203.4      | Klra17 | -3.086           | 0.015   |                                  |              |          |                    |            |            |                   |                 |                |             |                      |          |
| NM_178759.4      | Timd4  | -3.275           | 0.041   |                                  |              |          |                    |            |            |                   |                 |                |             |                      |          |
| NM_011888.2      | Ccl19  | -3.973           | 0.042   |                                  |              |          |                    |            |            |                   |                 |                |             |                      |          |
| XM_006507298.1   | Dmbt1  | -5.218           | 0.008   |                                  |              |          |                    |            |            |                   |                 |                |             |                      |          |

EMT: Epithelial Mesenchymal transition
