# Supplementary material
Source: PubMed Central journal article supplement (PMC5682105)
Supplement: NIHMS890803-supplement-4.pdf [file NIHMS890803-supplement-4.pdf]

**Table S-4. Differential expression for human associated genes at day 2**

| Gene Information |         |                              |         | Bio-functions                  |              |          |                    |            |            |                   |                 |                |     |                      |          |
|------------------|---------|------------------------------|---------|--------------------------------|--------------|----------|--------------------|------------|------------|-------------------|-----------------|----------------|-----|----------------------|----------|
| Probe ID         | Symbol  | Log <sub>2</sub> Fold Change | p Value | Inflammation - Immune response | Angiogenesis | Survival | Cell Proliferation | Cell Cycle | Cell death | Tumor progression | Viral Infection | Cell migration | EMT | Cell Differentiation | Invasion |
| NM_002507.1      | NGFR    | 2.015                        | 0.034   |                                |              |          |                    |            |            |                   |                 |                |     |                      |          |
| NM_005204.2      | MAP3K8  | 1.192                        | 0.030   |                                |              |          |                    |            |            |                   |                 |                |     |                      |          |
| NM_003994.4      | KITLG   | 0.759                        | 0.043   |                                |              |          |                    |            |            |                   |                 |                |     |                      |          |
| NM_000212.2      | ITGB3   | 0.684                        | 0.003   |                                |              |          |                    |            |            |                   |                 |                |     |                      |          |
| NM_004985.3      | KRAS    | 0.447                        | 0.007   |                                |              |          |                    |            |            |                   |                 |                |     |                      |          |
| NM_005896.2      | IDH1    | 0.383                        | 0.047   |                                |              |          |                    |            |            |                   |                 |                |     |                      |          |
| NM_003955.3      | SOCS3   | 0.336                        | 0.026   |                                |              |          |                    |            |            |                   |                 |                |     |                      |          |
| NM_001760.2      | CCND3   | 0.333                        | 0.027   |                                |              |          |                    |            |            |                   |                 |                |     |                      |          |
| NM_015850.2      | FGFR1   | -0.263                       | 0.026   |                                |              |          |                    |            |            |                   |                 |                |     |                      |          |
| NM_000267.2      | NF1     | -0.267                       | 0.019   |                                |              |          |                    |            |            |                   |                 |                |     |                      |          |
| NM_018315.4      | FBXW7   | -0.281                       | 0.034   |                                |              |          |                    |            |            |                   |                 |                |     |                      |          |
| NM_004721.3      | MAP3K13 | -0.315                       | 0.049   |                                |              |          |                    |            |            |                   |                 |                |     |                      |          |
| NM_003390.3      | WEE1    | -0.373                       | 0.037   |                                |              |          |                    |            |            |                   |                 |                |     |                      |          |
| NM_001102669.2   | RRAS2   | -0.387                       | 0.044   |                                |              |          |                    |            |            |                   |                 |                |     |                      |          |
| NM_032888.2      | COL27A1 | -0.447                       | 0.007   |                                |              |          |                    |            |            |                   |                 |                |     |                      |          |
| NM_013953.3      | PAX8    | -0.508                       | 0.033   |                                |              |          |                    |            |            |                   |                 |                |     |                      |          |
| NM_004083.4      | DDIT3   | -0.509                       | 0.034   |                                |              |          |                    |            |            |                   |                 |                |     |                      |          |
| NM_003200.2      | TCF3    | -0.549                       | 0.001   |                                |              |          |                    |            |            |                   |                 |                |     |                      |          |
| NM_015675.2      | GADD45B | -0.617                       | 0.017   |                                |              |          |                    |            |            |                   |                 |                |     |                      |          |
| NM_000601.4      | HGF     | -0.654                       | 0.033   |                                |              |          |                    |            |            |                   |                 |                |     |                      |          |
| NM_144728.2      | DUSP10  | -0.687                       | 0.006   |                                |              |          |                    |            |            |                   |                 |                |     |                      |          |
| NM_002632.5      | PGF     | -0.807                       | 0.009   |                                |              |          |                    |            |            |                   |                 |                |     |                      |          |
| NM_012242.2      | DKK1    | -0.811                       | 0.012   |                                |              |          |                    |            |            |                   |                 |                |     |                      |          |
| NM_001003679.1   | LEPR    | -1.064                       | 0.013   |                                |              |          |                    |            |            |                   |                 |                |     |                      |          |
| NM_022475.1      | HHIP    | -1.244                       | 0.004   |                                |              |          |                    |            |            |                   |                 |                |     |                      |          |
| NM_002155.3      | HSPA6   | -1.544                       | 0.035   |                                |              |          |                    |            |            |                   |                 |                |     |                      |          |
| NM_005252.2      | FOS     | -1.627                       | 0.001   |                                |              |          |                    |            |            |                   |                 |                |     |                      |          |
| NM_030753.3      | WNT3    | -1.632                       | 0.041   |                                |              |          |                    |            |            |                   |                 |                |     |                      |          |
| NM_000721.2      | CACNA1E | -1.636                       | 0.005   |                                |              |          |                    |            |            |                   |                 |                |     |                      |          |
| NM_000594.2      | TNF     | -2.090                       | 0.046   |                                |              |          |                    |            |            |                   |                 |                |     |                      |          |
| NM_007191.2      | WIF1    | -2.107                       | 0.011   |                                |              |          |                    |            |            |                   |                 |                |     |                      |          |
| NM_052847.1      | GNG7    | -2.455                       | 0.030   |                                |              |          |                    |            |            |                   |                 |                |     |                      |          |
| NM_002423.3      | MMP7    | -3.316                       | 0.003   |                                |              |          |                    |            |            |                   |                 |                |     |                      |          |
| NM_005635.2      | SSX1    | -4.116                       | 0.021   |                                |              |          |                    |            |            |                   |                 |                |     |                      |          |
| NM_025237.2      | SOST    | -4.473                       | 0.015   |                                |              |          |                    |            |            |                   |                 |                |     |                      |          |

EMT: Epithelial Mesenchymal transition
