# Supplementary material
Source: PubMed Central journal article supplement (PMC5682105)
Supplement: NIHMS890803-supplement-5.pdf [file NIHMS890803-supplement-5.pdf]

Continuation of table S-5

| Gene Information |        |                  |         | Bio-functions                |              |          |                    |            |            |                   |                 |                |     |                      |          |
|------------------|--------|------------------|---------|------------------------------|--------------|----------|--------------------|------------|------------|-------------------|-----------------|----------------|-----|----------------------|----------|
| Probe ID         | Symbol | Log2 Fold Change | p Value | Inflammation-immune response | Angiogenesis | Survival | Cell Proliferation | Cell Cycle | Cell death | Tumor progression | Viral Infection | Cell migration | EMT | Cell Differentiation | Invasion |
| NM_002193.2      | INHBB  | -2.393           | 0.008   |                              |              |          |                    |            |            |                   |                 |                |     |                      |          |
| NM_005045.2      | RELN   | -2.819           | 0.034   |                              |              |          |                    |            |            |                   |                 |                |     |                      |          |
| NM_014432.2      | IL20RA | -3.612           | 0.007   |                              |              |          |                    |            |            |                   |                 |                |     |                      |          |
| NM_000594.2      | TNF    | -3.873           | 0.030   |                              |              |          |                    |            |            |                   |                 |                |     |                      |          |
| NM_005635.2      | SSX1   | -3.951           | 0.022   |                              |              |          |                    |            |            |                   |                 |                |     |                      |          |
| NM_145259.2      | ACVR1C | -4.014           | 0.0001  |                              |              |          |                    |            |            |                   |                 |                |     |                      |          |
| NM_145159.1      | JAG2   | -4.404           | 0.0002  |                              |              |          |                    |            |            |                   |                 |                |     |                      |          |
| NM_001448.2      | GPC4   | -5.464           | 0.001   |                              |              |          |                    |            |            |                   |                 |                |     |                      |          |
| NM_001282353.1   | ITGB6  | -5.470           | 0.008   |                              |              |          |                    |            |            |                   |                 |                |     |                      |          |
| NM_004360.2      | CDH1   | -6.624           | 0.001   |                              |              |          |                    |            |            |                   |                 |                |     |                      |          |

EMT: Epithelial Mesenchymal transition
